# Supplementary material
Source: ML conference proceedings conference paper supplement (https://openaccess.thecvf.com/content/CVPR2024/html/Zolfi_YolOOD_Utilizing_Object_CVPR_2024_paper.html)
Supplement: Supplementary file 1 [file Zolfi_YolOOD_Utilizing_Object_CVPR_2024_supplemental.pdf]

# YoOOD: Utilizing Object Detection Concepts for Multi-Label Out-of-Distribution Detection Supplementary Material

## A. Background

### A.1. YOLO Object Detector

In this paper, we focus on the state-of-the-art one-stage YOLO object detector and leverage its capabilities. Since the emergence of YOLO’s first version [11], other versions have been published to further enhance its performance [1, 5, 9, 10]. However, since YOLOv3 [10], the architectural design of the network has not been altered substantially, and this design serves as the foundation for the recent state-of-the-art versions (*e.g.*, YOLOv4 [1], YOLOv5 [5]). Our proposed approach utilizes the latest version, YOLOv5.

**Architecture.** YOLO’s architecture is comprised of two components: (a) a backbone network used to extract features from the input image, and (b) three detection heads which process the image’s features at three different scales. These components are connected using the feature pyramid network (FPN) [8] topology, where feature maps from different blocks of the backbone are concatenated to feature maps of corresponding sizes in the detection heads. The size of a detection head is determined by the size of the input image and the network’s stride (downsampling factor) – 32, 16, and 8. This allows the network to detect objects of different sizes: the first detection head (with the largest stride) has a broader context, specializing in the detection of large objects, while the smallest one has finer resolution and specializes in the detection of small objects.

**Detection layer.** The last layer of each detection head predicts a 3D tensor of size  $W \times H \times (4 + 1 + N_c)$ , where  $W \times H$  is the grid size ( $W$  and  $H$  are the width and height, respectively) and  $4 + 1 + N_c$  (which we refer to as a *candidate*) encodes three parts:

- Bounding box offsets - four coordinate offsets from a predefined anchor box.
- Objectness score - a value that represents the model’s confidence that the bounding box contains an object.
- Class scores -  $N_c$  confidence scores indicating the presence of specific class categories.

To be more precise, every cell in the grid predicts three bounding boxes (associated with three predefined anchor boxes), resulting in a  $3 \times W \times H \times (4 + 1 + N_c)$  prediction.

**Training YOLO.** Every ground-truth object is associated with a single cell in each detection head. The input image is divided into an  $W \times H$  grid, and the responsible cell is determined by the grid cell that the object’s center falls in. Since each cell contains three candidates, each of which is associated with a different predefined anchor box, the specific candidate is determined to be the one with the highest intersection over union (IoU) value between the ground-truth bounding box and the candidate’s anchor box.

YOLO does not assume that the class categories are mutually exclusive; therefore the class score vector is trained with the multi-label configuration (the sigmoid function is applied on each output neuron).

**Postprocessing.** YOLO outputs a fixed number of candidates (the amount depends on the size of the input image) which are then filtered in three sequential steps:

- Objectness score filtering - only candidates whose objectness score exceeds a predefined threshold are passed to the next step.
- Class score filtering - only candidates that have at least one unconditional class score ( $Pr(Objectness) \cdot Pr(Class)$ ) that exceeds the predefined threshold are passed to the next step.
- Non-maximum suppression (NMS) - since many candidates can detect the same object, NMS is applied to reduce redundancy.

## B. OOD Detection Methods Examined

Let  $f$  be a multi-label image classifier with a shared parameter space  $\theta$  up to the penultimate feature space. For an input  $x$ , the output for the  $n^{\text{th}}$  class is:

$$f_{y_n}(x) = h(x; \theta) \cdot w_n \quad (1)$$

where  $h(x; \theta)$  is the feature vector in the penultimate layer and  $w_n$  is a vector that represents the weights corresponding to class  $n$ . The predictive probability of a binary label  $y_n$  is determined by a binary logistic classifier:

$$p(y_n = 1|x) = \frac{\exp(f_{y_n}(x))}{1 + \exp(f_{y_n}(x))} \quad (2)$$

where  $n \in \{1, \dots, N_c\}$ .

## B.1. Baseline Methods

The baselines (MaxLogit [4] and MSP [3]) considered in our paper can be formalized as follows:

$$\text{MaxLogit} = \max_n f_{y_n}(x) \quad (3)$$

$$\text{MSP} = \max_n \frac{\exp(f_{y_n}(x))}{\sum_n^{N_c} \exp(f_{y_n}(x))} \quad (4)$$

## B.2. State-of-the-Art Methods for OOD Detection in the Multi-Class Domain

We consider two state-of-the-art methods originally designed for the multi-class task: ODIN [7] and Mahalanobis [6]. These methods are adapted to the multi-label case (following the adaption proposed in [13]).

**ODIN.** The adapted ODIN score takes the maximum of the calibrated label-wise predictions and is formulated as follows:

$$\text{ODIN} = \max_n \frac{\exp(f_{y_n}(x)/T)}{1 + \exp(f_{y_n}(x)/T)} \quad (5)$$

Since ODIN also proposes input preprocessing (by adding small adversarial perturbations), the input is calculated using  $\hat{x} = x - \epsilon \cdot \text{sign}(-\nabla \ell_{\hat{y}_n})$ , where  $\ell_{\hat{y}_n}$  is the BCE loss for the label  $\hat{y}_n$  with the largest output, such that  $\hat{y}_n = \text{argmax}_n(p(y_n = 1|x))$ .

**Mahalanobis.** The Mahalanobis score is represented in the following way:

$$\mathbf{M}(x) = \max_n -(\phi(x) - \hat{\mu}_{y_n})^T \hat{\Sigma}^{-1} (\phi(x) - \hat{\mu}_{y_n}) \quad (6)$$

where the feature embedding  $\phi(x)$  is extracted for a given sample,  $\hat{\mu}_{y_n}$  is the class mean for label  $y_n$ , and  $\hat{\Sigma}^{-1}$  is the covariance matrix. Furthermore, we consider the calibration techniques proposed in the original paper [6]: (a) input preprocessing, and (b) feature ensemble. For preprocessing, the perturbed sample is defined as:

$$\begin{aligned} \hat{x} &= x + \epsilon \text{sign}(\nabla_x M(x)) = \\ &= x - \epsilon \text{sign}(\nabla(\phi(x) - \hat{\mu}_{y_n})^T \hat{\Sigma}^{-1} (\phi(x) - \hat{\mu}_{y_n})) \end{aligned} \quad (7)$$

For feature ensemble, the scores are extracted from each block and integrated by  $\sum_\ell \alpha_\ell M_\ell(\hat{x})$ , where  $\ell$  denotes the  $\ell$ -th block. In our evaluation, we use equal weights for all layers (*i.e.*,  $\alpha_\ell = 1$ ).

### B.2.1 Hyperparameter Selection

Since ODIN and Mahalanobis both require validation sets for hyperparameter selection, we consider the following setup proposed in [13] (corrupted in-distribution samples into OOD data):

- Pixel-wise arithmetic mean of random pairs of in-distribution images. Given two images  $x_1$  and  $x_2$ , the value of a pixel at location  $(i, j)$  in the new image is:

$$x_{\text{arth mean}}(i, j) = \frac{x_1(i, j) + x_2(i, j)}{2} \quad (8)$$

- Geometric mean of random pairs of in-distribution images. Given two images  $x_1$  and  $x_2$ , the value of a pixel at location  $(i, j)$  in the new image is:

$$x_{\text{geom mean}}(i, j) = \sqrt{x_1(i, j) \cdot x_2(i, j)} \quad (9)$$

- Random permutation of 16 equally sized patches of an in-distribution image.

These datasets are used to fine-tune the hyperparameters: magnitude of noise  $\epsilon$  for both and temperature  $T$  for ODIN. For ODIN,  $T \in \{1, 10, 100, 1000\}$ , and  $\epsilon$  is chosen from 21 evenly spaced in the range of  $[0, 0.004]$ . For Mahalanobis,  $\epsilon$  is chosen from  $[0, 0.0005, 0.001, 0.002, 0.005]$ . The optimal  $\epsilon$  and  $T$  values are the ones that minimize the FPR95.

## B.3. State-of-the-Art Methods for OOD Detection in the Multi-Label Domain

**JointEnergy.** We also consider the state-of-the-art multi-label OOD detection method JointEnergy [13]:

$$\begin{aligned} E_{y_n}(x) &= -\log(1 + \exp(f_{y_n}(x))) \\ E_{\text{joint}}(x) &= \sum_{n=1}^{N_c} -E_{y_n}(x) \end{aligned} \quad (10)$$

## C. Proposed Datasets

### C.1. In-Distribution Dataset

**Objects365<sub>in</sub>.** We propose a new in-distribution benchmark for OOD detection in the multi-label domain, which is a subset of the Objects365 dataset [12]. The specific classes, which are chosen according to their frequency in the dataset (*i.e.*, the 20 most common classes that do not overlap with the OOD dataset), are: *person, chair, car, boat, wild bird, bench, sailboat, bottle, potted plant, cup, handbag/satchel, dog, bus, train, umbrella, cow, airplane, cat, truck, and horse*. We divided the images into three sets consisting of 68,723, 5,000, and 10,000 images for the training, validation, and test sets, respectively.

### C.2. OOD Datasets

We propose two new benchmarks constructed from datasets that contain images associated with multiple class categories and instances, thus reflecting the complexity of the multi-label setting: a subset from the Objects365 [12] dataset and a subset from the NUS-WIDE dataset [2].

**Objects365<sub>out</sub>.** A subset of 241 classes which do not overlap with any of the classes present in the in-distribution

datasets, and specifically with the classes present in the Objects365<sub>in</sub> subset presented above, containing a total of 11,669 images. For example, The top-10 most frequent classes are (sorted in descending order): *lamp, street lights, storage box, picture/frame, cabinet/shelf, flag, air conditioner, sneakers, trash bin can, fish*. The full list of the class can be found online.<sup>1</sup>

**NUS-WIDE<sub>out</sub>.** A subset of 54 classes that do not overlap with any of the classes in the in-distribution datasets containing 13,149 images. The specific classes are: *beach, bridge, buildings, castle, cityscape, clouds, coral, earthquake, elk, fire, fish, flags, flowers, fox, frost, garden, glacier, grass, harbor, house, lake, leaf, map, military, moon, mountain, nighttime, ocean, plants, police, railroad, rainbow, reflection, road, rocks, sand, sign, snow, sports, statue, street, sun, sunset, temple, tiger, tower, town, toy, tree, valley, water, waterfall, whales, window*.

## D. Results

### D.1. Effect of Responsible Grid Cell Percentage $p_k$

As discussed in Section 4.2 in the paper, we characterize the effect of the percentage  $\{p_k | k \in \{1, 2, 3\}\}$  of responsible cells (described in Section 3.1), where  $p_1$  (resp.  $p_3$ ) represents the smallest (resp. largest) detection head. We perform an extensive evaluation to examine the effect of different  $p_k$  combinations, where  $p_k$  is selected from 11 evenly spaced numbers in the range  $[0, 1]$ . To limit the number of possible combinations, we set a constraint such that  $p_3 > p_2 > p_1$ , based on the fact that the grid’s resolution increases in each subsequent detection head, resulting in 165 different combinations. Figure 1 presents the mAP results for the different combinations of  $p_k$  across the different datasets. It is interesting to observe the consistent pattern present across all datasets, where we can see that  $p_1$  benefits most from the lower range ( $\sim [0.0 - 0.2]$ ),  $p_2$  benefits from slightly higher range ( $\sim [0.1 - 0.4]$ ), and  $p_3$  benefits from the upper range ( $\sim [0.3 - 0.7]$ ). Furthermore, as stated in Section 3.1, the results confirm that since bounding boxes do not accurately segment the object’s area, setting  $p_k = 1$  degrades the model’s performance, likely due to the background areas included in the annotated bounding boxes. To obtain the optimal combination, after training, we sort all the models according to their in-distribution mAP and select the 20 best-performing ones. Then, we count the number of occurrences for all  $p_k$  values (each  $p_k$  is counted independently, not as a triplet) and select the most frequent values. We aggregate the results over all of the in-distribution datasets and find that the best configuration is:  $(p_1, p_2, p_3) = (0.0, 0.1, 0.5)$ . We recommend using this configuration for all datasets, *i.e.*,  $p_k$  is not a hyperparameter that should be tuned.

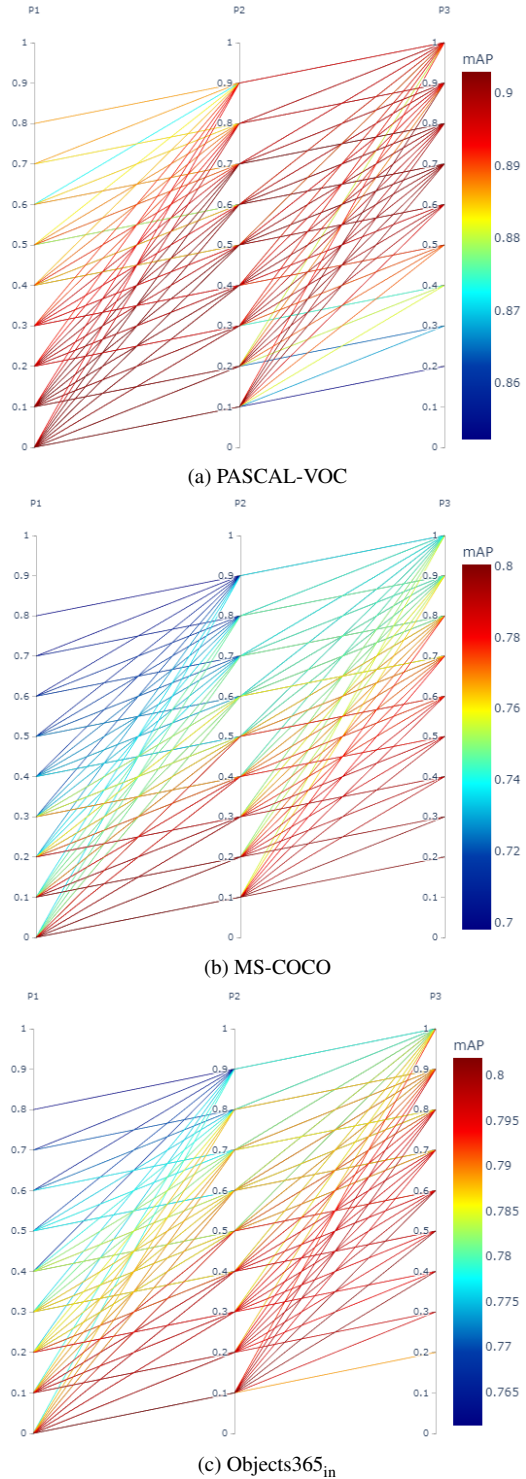

Figure 1. Models’ mAP for different  $p_k$  combinations on the (a) PASCAL-VOC, (b) MS-COCO, and (c) Objects365<sub>in</sub> datasets. Each line represents a model trained with a single combination.

<sup>1</sup><https://github.com/AlonZolfi/YoLOOD>

## D.2. In-Distribution mAP

For a comprehensive comparison of OOD detection performance, we also provide the in-distribution mAP results for the YOLO-cl<sub>s</sub> and YoOOD models. Table 1 presents the results on the various in-distribution datasets, showing that YoOOD’s mAP is on par with that of YOLO-cl<sub>s</sub>. Despite the slight differences, in the OOD detection task, YoOOD outperforms all state-of-the-art OOD detection methods (which use YOLO-cl<sub>s</sub>), demonstrating the superiority of our proposed approach. It should be noted that when training the networks from “scratch” (*i.e.*, no pre-trained weights are used), YoOOD achieves substantially better results on both the in-distribution mAP and OOD detection metrics. However, for a fair comparison between the different methods, we followed the training scheme of using a pre-trained backbone.

| Model                | $\mathcal{D}_{in}$ | PASCAL-VOC | MS-COCO | Objects365 <sub>in</sub> |
|----------------------|--------------------|------------|---------|--------------------------|
| YOLO-cl <sub>s</sub> |                    | 91.09      | 81.83   | 81.53                    |
| YoOOD-a <sup>1</sup> |                    | 88.64      | 76.81   | 78.48                    |
| YoOOD-o <sup>2</sup> |                    | 89.15      | 78.97   | 79.71                    |

Table 1. In-distribution mAP comparison on the YOLO-cl<sub>s</sub> and YoOOD models on the in-distribution datasets. <sup>1</sup>Trained using the auto-generated annotations. <sup>2</sup>Trained using the original annotations.

## D.3. Additional Results

In addition to the OOD detection results presented in the paper, we provide the full results of all the experiments conducted in our evaluation, including both the mean and standard deviation.

Table 2 presents the OOD detection performance of YoOOD vs. state-of-the-art OOD detection methods.

Table 3 presents the OOD detection performance when using different combinations of aggregation functions for YoOOD’s detection heads and class scores output vector.

Table 4 presents the OOD detection performance when using JointEnergy on YoOOD and YOLO-cl<sub>s</sub> networks.

Table 5 presents the OOD detection performance between YoOOD and a standard YOLO object detector.

Table 2. Comparison of the OOD detection performance of YoLODD vs. state-of-the-art methods. ↓ indicates that lower values are better, and ↑ indicates that higher values are better.

<sup>1</sup>Trained using the auto-generated annotations. <sup>2</sup>Trained using the original annotations.

| $\mathcal{D}_{out}$       | Method                | $\mathcal{D}_{in}$                         | PASCAL-VOC                                 | MS-COCO                                    |  | Objects365 <sub>in</sub> |
|---------------------------|-----------------------|--------------------------------------------|--------------------------------------------|--------------------------------------------|--|--------------------------|
|                           |                       |                                            |                                            | FPR95 ↓ / AUROC ↑ / AUPR ↑                 |  |                          |
| Objects365 <sub>out</sub> | MaxLogit [4]          | 28.91 ± 0.71 / 94.96 ± 0.11 / 95.32 ± 0.16 | 16.39 ± 0.58 / 96.90 ± 0.09 / 99.17 ± 0.03 | 29.95 ± 0.81 / 94.33 ± 0.21 / 94.38 ± 0.30 |  |                          |
|                           | MSP [3]               | 50.78 ± 1.50 / 88.36 ± 0.37 / 88.61 ± 0.39 | 46.25 ± 0.16 / 86.78 ± 0.28 / 95.63 ± 0.13 | 65.20 ± 0.88 / 83.99 ± 0.42 / 84.13 ± 0.59 |  |                          |
|                           | ODIN [7]              | 28.91 ± 0.71 / 94.96 ± 0.11 / 95.32 ± 0.16 | 16.39 ± 0.58 / 96.90 ± 0.09 / 99.17 ± 0.03 | 29.95 ± 0.81 / 94.33 ± 0.21 / 94.38 ± 0.30 |  |                          |
|                           | Mahalanobis [6]       | 73.34 ± 0.45 / 73.90 ± 0.18 / 70.94 ± 0.25 | 87.69 ± 0.13 / 52.13 ± 0.15 / 77.53 ± 0.11 | 83.30 ± 0.23 / 63.23 ± 0.15 / 56.69 ± 0.19 |  |                          |
|                           | JointEnergy [13]      | 27.90 ± 1.29 / 95.37 ± 0.18 / 96.04 ± 0.13 | 14.80 ± 0.40 / 97.16 ± 0.07 / 99.28 ± 0.02 | 23.13 ± 0.42 / 95.84 ± 0.12 / 96.20 ± 0.17 |  |                          |
|                           | YoLODD-a <sup>1</sup> | 18.37 ± 0.51 / 96.10 ± 0.20 / 95.85 ± 0.32 | 11.70 ± 0.15 / 97.21 ± 0.01 / 99.19 ± 0.01 | 18.40 ± 0.66 / 95.76 ± 0.10 / 95.15 ± 0.13 |  |                          |
|                           | YoLODD-o <sup>2</sup> | 16.38 ± 0.70 / 96.60 ± 0.22 / 96.50 ± 0.28 | 11.53 ± 0.22 / 97.30 ± 0.05 / 99.23 ± 0.02 | 17.24 ± 0.33 / 95.97 ± 0.06 / 95.42 ± 0.06 |  |                          |
| NUS-WIDE <sub>out</sub>   | MaxLogit [4]          | 23.60 ± 1.27 / 95.99 ± 0.21 / 96.05 ± 0.19 | 12.16 ± 0.27 / 97.53 ± 0.06 / 99.24 ± 0.02 | 38.07 ± 2.62 / 92.62 ± 0.37 / 91.48 ± 0.39 |  |                          |
|                           | MSP [3]               | 47.34 ± 1.61 / 89.34 ± 0.42 / 88.71 ± 0.41 | 40.89 ± 0.62 / 88.33 ± 0.22 / 95.53 ± 0.10 | 78.08 ± 1.20 / 78.42 ± 0.63 / 76.91 ± 0.62 |  |                          |
|                           | ODIN [7]              | 23.60 ± 1.27 / 95.99 ± 0.21 / 96.05 ± 0.19 | 12.16 ± 0.27 / 97.53 ± 0.06 / 99.24 ± 0.02 | 38.07 ± 2.62 / 92.62 ± 0.37 / 91.48 ± 0.39 |  |                          |
|                           | Mahalanobis [6]       | 77.23 ± 0.31 / 73.76 ± 0.35 / 67.76 ± 0.53 | 88.74 ± 0.13 / 60.35 ± 0.22 / 80.85 ± 0.14 | 88.54 ± 0.14 / 62.34 ± 0.17 / 54.12 ± 0.21 |  |                          |
|                           | JointEnergy [13]      | 20.19 ± 1.78 / 96.53 ± 0.22 / 96.76 ± 0.18 | 8.29 ± 0.23 / 97.90 ± 0.04 / 99.39 ± 0.01  | 24.46 ± 1.55 / 95.34 ± 0.21 / 94.96 ± 0.24 |  |                          |
|                           | YoLODD-a <sup>1</sup> | 21.24 ± 0.78 / 96.29 ± 0.09 / 96.08 ± 0.16 | 7.62 ± 0.37 / 98.13 ± 0.07 / 99.43 ± 0.03  | 12.19 ± 0.73 / 97.64 ± 0.12 / 97.29 ± 0.14 |  |                          |
|                           | YoLODD-o <sup>2</sup> | 18.48 ± 0.76 / 96.85 ± 0.16 / 96.77 ± 0.22 | 4.40 ± 0.12 / 98.57 ± 0.03 / 99.58 ± 0.01  | 9.54 ± 0.57 / 98.01 ± 0.05 / 97.61 ± 0.06  |  |                          |

Table 3. OOD detection performance when using different combinations of aggregation functions on YoLODD’s detection heads and class scores output vector. ↓ indicates that lower values are better, and ↑ indicates that higher values are better.

| $\mathcal{D}_{out}$       | Class Agg. | Head Agg. | $\mathcal{D}_{in}$                         | PASCAL-VOC                                 | MS-COCO                                    |  | Objects365 <sub>in</sub> |
|---------------------------|------------|-----------|--------------------------------------------|--------------------------------------------|--------------------------------------------|--|--------------------------|
|                           |            |           |                                            |                                            | FPR95 ↓ / AUROC ↑ / AUPR ↑                 |  |                          |
| Objects365 <sub>out</sub> | Max        | Max       | 20.06 ± 0.68 / 96.29 ± 0.16 / 96.52 ± 0.20 | 8.54 ± 0.18 / 97.97 ± 0.03 / 99.46 ± 0.01  | 20.55 ± 0.62 / 96.01 ± 0.02 / 95.96 ± 0.03 |  |                          |
|                           |            | Multiply  | 23.19 ± 1.92 / 95.11 ± 0.50 / 94.89 ± 0.57 | 15.62 ± 0.39 / 96.69 ± 0.08 / 99.06 ± 0.03 | 26.05 ± 1.01 / 94.56 ± 0.25 / 93.99 ± 0.23 |  |                          |
|                           |            | Sum       | 16.38 ± 0.70 / 96.60 ± 0.22 / 96.50 ± 0.28 | 11.53 ± 0.22 / 97.30 ± 0.05 / 99.23 ± 0.02 | 17.24 ± 0.33 / 95.97 ± 0.06 / 95.42 ± 0.06 |  |                          |
|                           | Sum        | Max       | 40.04 ± 1.80 / 82.03 ± 1.14 / 77.46 ± 1.54 | 53.25 ± 0.61 / 82.31 ± 0.26 / 93.63 ± 0.15 | 38.86 ± 0.85 / 84.24 ± 0.16 / 78.66 ± 0.29 |  |                          |
|                           |            | Multiply  | 23.15 ± 1.79 / 95.11 ± 0.51 / 94.94 ± 0.58 | 14.76 ± 0.43 / 96.98 ± 0.07 / 99.17 ± 0.02 | 25.71 ± 1.14 / 94.70 ± 0.25 / 94.27 ± 0.24 |  |                          |
|                           |            | Sum       | 37.31 ± 2.19 / 86.73 ± 1.05 / 85.04 ± 1.19 | 41.27 ± 0.71 / 89.57 ± 0.18 / 96.71 ± 0.07 | 35.22 ± 0.80 / 90.85 ± 0.19 / 89.25 ± 0.19 |  |                          |
| NUS-WIDE <sub>out</sub>   | Max        | Max       | 28.14 ± 1.03 / 94.97 ± 0.37 / 94.70 ± 0.52 | 8.55 ± 0.21 / 98.05 ± 0.04 / 99.40 ± 0.01  | 21.48 ± 0.64 / 95.40 ± 0.19 / 94.19 ± 0.26 |  |                          |
|                           |            | Multiply  | 16.32 ± 0.53 / 96.92 ± 0.19 / 96.60 ± 0.25 | 5.48 ± 0.20 / 98.49 ± 0.04 / 99.55 ± 0.01  | 10.40 ± 0.32 / 97.90 ± 0.10 / 97.36 ± 0.13 |  |                          |
|                           |            | Sum       | 18.48 ± 0.76 / 96.85 ± 0.16 / 96.77 ± 0.22 | 4.40 ± 0.12 / 98.57 ± 0.03 / 99.58 ± 0.01  | 9.54 ± 0.57 / 98.01 ± 0.05 / 97.61 ± 0.06  |  |                          |
|                           | Sum        | Max       | 49.09 ± 2.06 / 74.59 ± 1.79 / 64.33 ± 2.83 | 56.15 ± 0.46 / 78.87 ± 0.24 / 90.78 ± 0.16 | 31.66 ± 1.28 / 87.09 ± 0.65 / 79.90 ± 0.86 |  |                          |
|                           |            | Multiply  | 16.01 ± 0.61 / 96.97 ± 0.19 / 96.66 ± 0.24 | 4.45 ± 0.13 / 98.64 ± 0.03 / 99.60 ± 0.01  | 9.39 ± 0.39 / 98.08 ± 0.09 / 97.61 ± 0.12  |  |                          |
|                           |            | Sum       | 42.90 ± 2.29 / 83.08 ± 1.37 / 78.62 ± 1.84 | 37.73 ± 0.45 / 90.83 ± 0.12 / 96.72 ± 0.05 | 17.13 ± 1.48 / 96.51 ± 0.26 / 95.54 ± 0.31 |  |                          |

Table 4. OOD detection performance comparison when applying JointEnergy on YoLODD and YOLO-cla networks. ↓ indicates lower values are better, and ↑ indicates higher values are better.

| $\mathcal{D}_{out}$       | Model    | $\mathcal{D}_{in}$                         | PASCAL-VOC                                 | MS-COCO                                    |  | Objects365 <sub>in</sub> |
|---------------------------|----------|--------------------------------------------|--------------------------------------------|--------------------------------------------|--|--------------------------|
|                           |          |                                            |                                            | FPR95 ↓ / AUROC ↑ / AUPR ↑                 |  |                          |
| Objects365 <sub>out</sub> | YOLO-cla | 27.90 ± 1.29 / 95.37 ± 0.18 / 96.04 ± 0.13 | 14.80 ± 0.40 / 97.16 ± 0.07 / 99.28 ± 0.02 | 23.13 ± 0.42 / 95.84 ± 0.12 / 96.20 ± 0.17 |  |                          |
|                           | YoLODD   | 17.41 ± 0.81 / 96.77 ± 0.16 / 97.04 ± 0.18 | 7.10 ± 0.13 / 98.20 ± 0.01 / 99.54 ± 0.01  | 15.91 ± 0.41 / 96.93 ± 0.03 / 96.97 ± 0.03 |  |                          |
| NUS-WIDE <sub>out</sub>   | YOLO-cla | 20.19 ± 1.78 / 96.53 ± 0.22 / 96.76 ± 0.18 | 8.29 ± 0.23 / 97.90 ± 0.04 / 99.39 ± 0.01  | 24.46 ± 1.55 / 95.34 ± 0.21 / 94.96 ± 0.24 |  |                          |
|                           | YoLODD   | 23.66 ± 1.40 / 95.88 ± 0.34 / 95.72 ± 0.43 | 4.65 ± 0.24 / 98.57 ± 0.02 / 99.58 ± 0.01  | 11.51 ± 0.66 / 97.77 ± 0.09 / 97.37 ± 0.11 |  |                          |

Table 5. OOD detection performance comparison between YoLODD and a regular YOLO detector. ↓ indicates lower values are better, and ↑ indicates higher values are better.

| $\mathcal{D}_{out}$       | Model  | $\mathcal{D}_{in}$                         | PASCAL-VOC                                 | MS-COCO                                    |  | Objects365 <sub>in</sub> |
|---------------------------|--------|--------------------------------------------|--------------------------------------------|--------------------------------------------|--|--------------------------|
|                           |        |                                            |                                            | FPR95 ↓ / AUROC ↑ / AUPR ↑                 |  |                          |
| Objects365 <sub>out</sub> | YOLO   | 40.57 ± 1.02 / 92.16 ± 0.26 / 92.66 ± 0.25 | 20.03 ± 0.13 / 96.40 ± 0.05 / 99.02 ± 0.02 | 28.64 ± 0.86 / 94.06 ± 0.10 / 93.66 ± 0.12 |  |                          |
|                           | YoLODD | 16.38 ± 0.70 / 96.60 ± 0.22 / 96.50 ± 0.28 | 11.53 ± 0.22 / 97.30 ± 0.05 / 99.23 ± 0.02 | 17.24 ± 0.33 / 95.97 ± 0.06 / 95.42 ± 0.06 |  |                          |
| NUS-WIDE <sub>out</sub>   | YOLO   | 29.90 ± 2.29 / 94.54 ± 0.34 / 94.24 ± 0.32 | 7.20 ± 0.23 / 98.27 ± 0.02 / 99.48 ± 0.01  | 17.99 ± 0.86 / 96.43 ± 0.11 / 95.60 ± 0.11 |  |                          |
|                           | YoLODD | 18.48 ± 0.76 / 96.85 ± 0.16 / 96.77 ± 0.22 | 4.40 ± 0.12 / 98.57 ± 0.03 / 99.58 ± 0.01  | 9.54 ± 0.57 / 98.01 ± 0.05 / 97.61 ± 0.06  |  |                          |

## References

- [1] Alexey Bochkovskiy, Chien-Yao Wang, and Hong-Yuan Mark Liao. Yolov4: Optimal speed and accuracy of object detection. *arXiv preprint arXiv:2004.10934*, 2020. [1](#)
- [2] Tat-Seng Chua, Jinhui Tang, Richang Hong, Haojie Li, Zhiping Luo, and Yantao Zheng. Nus-wide: a real-world web image database from national university of singapore. In *Proceedings of the ACM international conference on image and video retrieval*, pages 1–9, 2009. [2](#)
- [3] Dan Hendrycks and Kevin Gimpel. A baseline for detecting misclassified and out-of-distribution examples in neural networks. In *International Conference on Learning Representations*, 2017. [2](#), [5](#)
- [4] Dan Hendrycks, Steven Basart, Mantas Mazeika, Mohammadreza Mostajabi, Jacob Steinhardt, and Dawn Song. Scaling out-of-distribution detection for real-world settings. *arXiv preprint arXiv:1911.11132*, 2019. [2](#), [5](#)
- [5] Glenn Jocher. ultralytics/yolov5: v6.0 - yolov5n 'nano' models, roboflow integration, tensorflow export, opencv dnn support, 2021. [1](#)
- [6] Kimin Lee, Kibok Lee, Honglak Lee, and Jinwoo Shin. A simple unified framework for detecting out-of-distribution samples and adversarial attacks. *Advances in neural information processing systems*, 31, 2018. [2](#), [5](#)
- [7] Shiyu Liang, Yixuan Li, and R Srikant. Enhancing the reliability of out-of-distribution image detection in neural networks. In *6th International Conference on Learning Representations, ICLR 2018*, 2018. [2](#), [5](#)
- [8] Tsung-Yi Lin, Piotr Dollár, Ross Girshick, Kaiming He, Bharath Hariharan, and Serge Belongie. Feature pyramid networks for object detection. In *Proceedings of the IEEE conference on computer vision and pattern recognition*, pages 2117–2125, 2017. [1](#)
- [9] Joseph Redmon and Ali Farhadi. Yolo9000: better, faster, stronger. In *Proceedings of the IEEE conference on computer vision and pattern recognition*, pages 7263–7271, 2017. [1](#)
- [10] Joseph Redmon and Ali Farhadi. Yolov3: An incremental improvement. *arXiv preprint arXiv:1804.02767*, 2018. [1](#)
- [11] Joseph Redmon, Santosh Divvala, Ross Girshick, and Ali Farhadi. You only look once: Unified, real-time object detection. In *Proceedings of the IEEE conference on computer vision and pattern recognition*, pages 779–788, 2016. [1](#)
- [12] Shuai Shao, Zeming Li, Tianyuan Zhang, Chao Peng, Gang Yu, Xiangyu Zhang, Jing Li, and Jian Sun. Objects365: A large-scale, high-quality dataset for object detection. In *Proceedings of the IEEE/CVF international conference on computer vision*, pages 8430–8439, 2019. [2](#)
- [13] Haoran Wang, Weitang Liu, Alex Bocchieri, and Yixuan Li. Can multi-label classification networks know what they don't know? *Advances in Neural Information Processing Systems*, 34:29074–29087, 2021. [2](#), [5](#)
